# Supplementary material
Source: PubMed Central journal article supplement (PMC3039338)

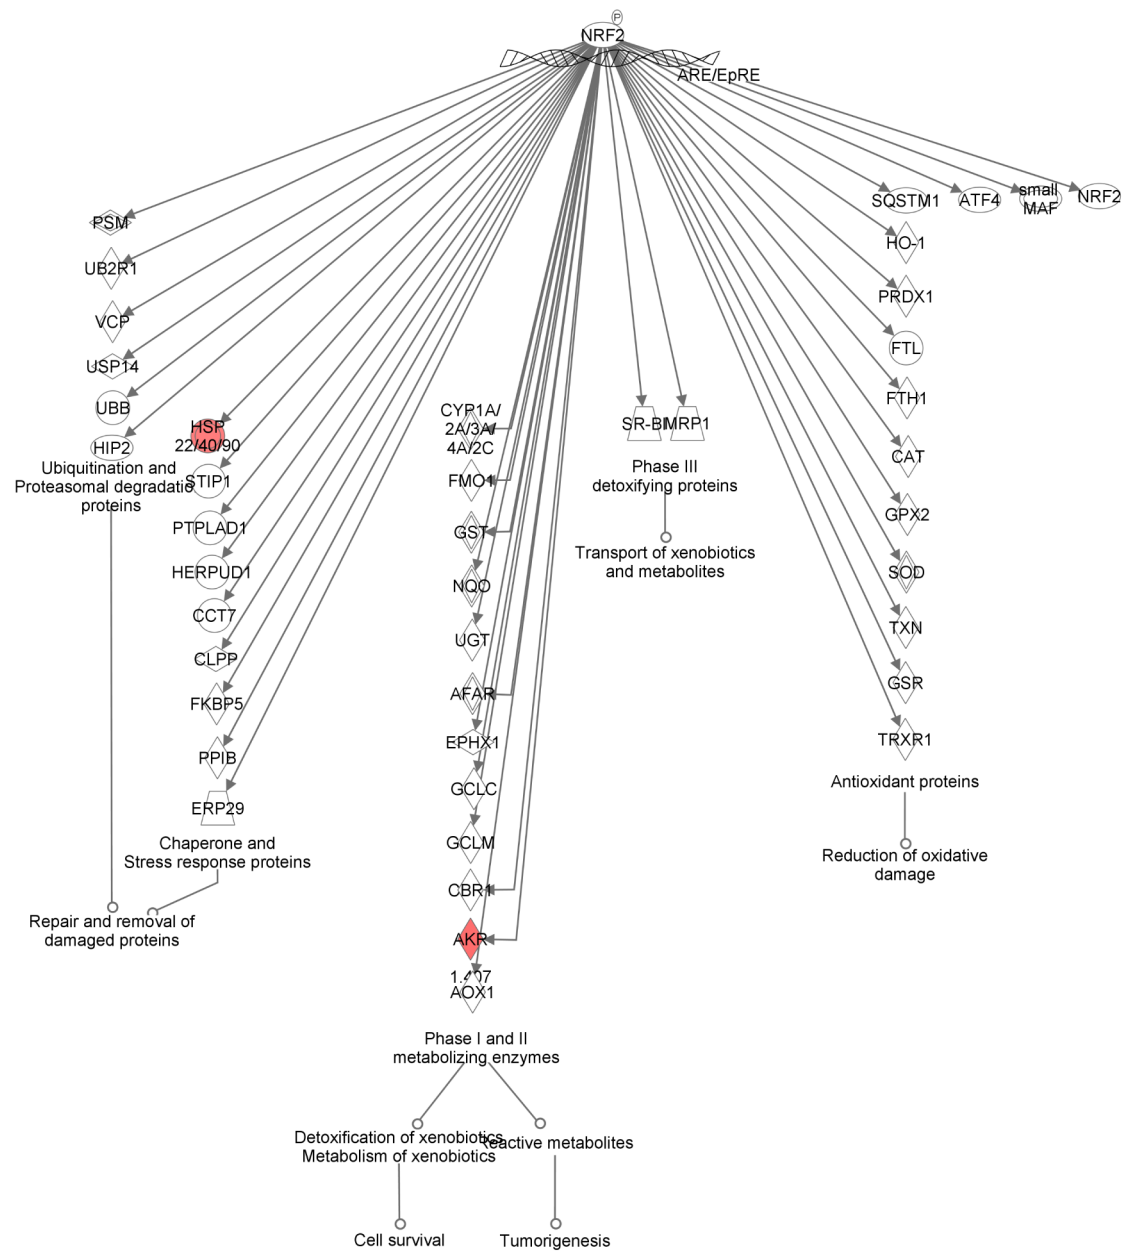

Supplement: supp_M110.147371_jbc.M110.147371-1.pdf [file supp_M110.147371_jbc.M110.147371-1.pdf]

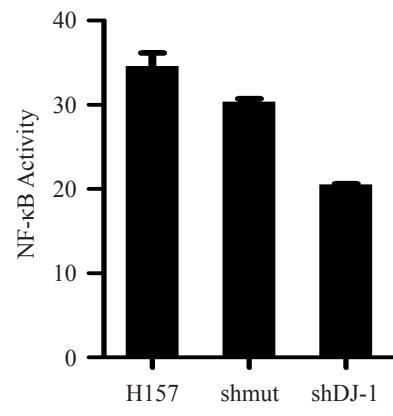

Supplement: supp_M110.147371_jbc.M110.147371-2.pdf [file supp_M110.147371_jbc.M110.147371-2.pdf]
